# Supplementary material for: Evaluation of surface sampling techniques for collection of Bacillus spores on common drinkingwater pipe materials
Source: Royal Society of Chemistry journal article supplement (doi:10.1039/b917570a), 2009-12-10
Supplement: b917570a.pdf [file b917570a.pdf]

## Quality Control Details

### Testing and Measurement Protocols

The following charts summarize the measurement protocols used for biofilm and spore enumeration as well as for water parameter sampling:

#### Sample Measurements

| Parameter                 | Analytical method             | Sampling procedure                                                 | Sample size/ container                     | Replicates | Preservation and storage                        | Maximum holding time |
|---------------------------|-------------------------------|--------------------------------------------------------------------|--------------------------------------------|------------|-------------------------------------------------|----------------------|
| Heterotrophic Plate Count | <i>Standard Method 9215A.</i> | Scraped from 38 cm <sup>2</sup> coupon into large Petri dish       | 100 mL sample container/ .1 mL spreadplate | 3          | Initiate analysis immediately, or store at 4°C. | 24 hours             |
| Spread plating            | <i>Standard Method 9215C</i>  | Scraped from 39 cm <sup>2</sup> into 120 mL coliform sample bottle | ~.1 mL                                     | 3          | Initiate analysis immediately, or store at 4°C. | 24 hours             |

#### Water Quality Samples

| Parameter               | Analytical method                                  | Reference                          | Sample size/ container | Preservation and storage | Maximum holding time |
|-------------------------|----------------------------------------------------|------------------------------------|------------------------|--------------------------|----------------------|
| pH                      | pH-meter                                           | <i>Standard Methods 1992</i>       | 100 mL beaker          | NA                       | NA                   |
| Conductivity            | Extech handheld conductivity and temperature meter | <i>Standard Methods 2510 B</i>     | In situ                | NA                       | NA                   |
| Temperature             | Extech handheld conductivity and temperature meter | <i>Standard Methods 2550</i>       | In situ                | NA                       | NA                   |
| Total and free chlorine | Hach DR 2400 Spectrophotometer                     | <i>Standard Methods 4500-CL G.</i> | 50 mL beaker           | NA                       | NA                   |

## QA Objectives

All analytical samples taken included positive and negative controls to ensure that the samples that are analyzed are accurately defined. No fewer than three replicates were taken to get representative samples. Samples that are outside of the limits of detection, or that do not meet the acceptance criteria required for the method, will be noted and checked for possible errors contributing to the result. Where possible, the tests will be repeated. The following table summarizes the QA samples to be taken.

### QA/QC Criteria

| Media                         | Measurement             | QA/QC Check                                                                                                                                                       | Acceptance Criteria                       | Corrective Action                                                                                                          | Frequency                                                        |
|-------------------------------|-------------------------|-------------------------------------------------------------------------------------------------------------------------------------------------------------------|-------------------------------------------|----------------------------------------------------------------------------------------------------------------------------|------------------------------------------------------------------|
| Water Parameters              |                         | Check Standard                                                                                                                                                    | 80-120% recovery                          | Retake samples                                                                                                             |                                                                  |
|                               | pH                      | Check against pH 7 buffer                                                                                                                                         | ± 0.2 pH units                            | Use different DO meter                                                                                                     | Every sampling event                                             |
|                               | Alkalinity              | Negative control samples                                                                                                                                          | 6.9<pH<7.1                                | Recalibrate meter and recheck                                                                                              | When time and resources permig                                   |
|                               | Conductivity            | Check solutions of 200 mS and 2.00 mS                                                                                                                             | Reading ± 10% of expected value           | Adjust meter                                                                                                               | During Phase 2 experiments                                       |
|                               | Free and total chlorine | Check tap water fresh from the system                                                                                                                             | Reading ± 10% of expected value (~1 mg/L) | Calibrate spectrophotometer/ replace reagents                                                                              | Weekly when coupons are exposed to drinking water                |
|                               | Temperature             | Check thermometer against a calibrated thermometer                                                                                                                | ±0.5°C                                    | Note discrepancies                                                                                                         | Weekly and during every sampling event                           |
| Coupon                        | Spore Enumeration       | TSA Blank:<br>Incubate plates                                                                                                                                     | No observed growth                        | Remake plates                                                                                                              | Every spore sampling event                                       |
|                               |                         | Spore Viability and quantitation:<br>Positive Control plate spike (Known quantity of spores spiked onto TSA)                                                      | 100-200 CFU/plate                         | Check spore suspension and dilution procedures                                                                             | Every spore sampling event                                       |
|                               |                         | Coupon check:<br>Process coupon without adding spores to determine if there is contamination on the coupon. (this is combined with matrix spike)                  | No observed growth                        | Determine potential sources of contamination, sterilize all surfaces and equipment and process a second coupon.            | Two times for each surface preparation pipe material combination |
|                               |                         | Buffer check:<br>Plate buffer solution on TSA to determine sterility                                                                                              | No observed growth                        | Remake buffer/autoclave all glassware                                                                                      | Every spore sampling event                                       |
|                               |                         | Tap water check:<br>Plate tap water used for growing biofilm, and rinsing/spiking coupons                                                                         | No observed <i>B. globigii</i> growth     | Sample tap water from tank a second time and autoclave all glassware                                                       | Every spore sampling event                                       |
|                               |                         | Matrix spike:<br>Scrape biofilm from iron, cement-lined, and PVC. Spike each with 1 mL of spore suspension to determine impact of corrosion on spore enumeration. | 100-200 CFU/plate                         | Compare to counts without corrosion and note differences                                                                   | Two replicates for each phase.                                   |
|                               |                         | Membrane Filter Sterility check: Sterile PBDW with .01% Tween added to MF UV sterilized funnel and sterile filter.                                                | No observed <i>B. globigii</i> growth     | Resterilize funnel again, ensure that filters are sterile, clean funnels to ensure there is no rust/corrosion on surfaces. | One check for every 10 samples.                                  |
|                               | Biofilm HPC             | Buffer blank:<br>Plate buffer solution on R2A plates                                                                                                              | No observed growth                        | Remake buffer                                                                                                              | Every biofilm sampling event                                     |
| R2A Blank:<br>Incubate plates |                         | No observed growth                                                                                                                                                | Remake plates                             | Every biofilm sampling event                                                                                               |                                                                  |

## Equipment

Equipment such as the pH meters were used in accordance with the manufacturer's manuals for those pieces of equipment. Larger equipment (refrigerators, autoclaves) were operated using the standard SOPs outlined in the facility SOP manual. Laboratory equipment and instrumentation were checked for accuracy as directed in Standard Methods 9020 B. The following chart summarizes data requirements for equipment:

### Data Requirements

| <b>Data Quality Acceptable If...</b>                                                                                                                                                              | <b>Corrective Action If Unacceptable</b>                                                                                                               |
|---------------------------------------------------------------------------------------------------------------------------------------------------------------------------------------------------|--------------------------------------------------------------------------------------------------------------------------------------------------------|
| All equipment, sensor, and meter calibrations are current.                                                                                                                                        | Out-of-date calibrations will be corrected by recalibration or replacement of item and the analysis redone.                                            |
| Reagents used are not past expiration date.<br>Reagent grade chemicals are used.<br>Microbiological grade agar used.<br>Traceable standards.<br>Negative controls are used to test for sterility. | Expired reagents will be replaced and the analysis redone. Reject chemicals/agar that is not proper grade.                                             |
| Refrigerators, autoclaves, and incubators are operating at the required temperature.                                                                                                              | If temperatures were not maintained within the required limits of the test, the equipment will be fixed or calibrated and the analysis will be redone. |

The following chart summarizes calibration, use, and maintenance for the equipment to be used:

### Calibration, Use, and Maintenance of Equipment

| Equipment                                               | QA/QC                                                                                                                                                                                                                                   | Frequency                                    | Acceptable Criteria                      | Corrective Measures                                                                                                      |
|---------------------------------------------------------|-----------------------------------------------------------------------------------------------------------------------------------------------------------------------------------------------------------------------------------------|----------------------------------------------|------------------------------------------|--------------------------------------------------------------------------------------------------------------------------|
| Centrifuges                                             | EPA centrifuges are under a Preventative Maintenance Agreement (PMA) and undergo an annual PM.                                                                                                                                          | Quarterly or as described                    | Described in instrument manual or SOP    | Described in instrument manual or SOP: All non-conformances are corrected before the instrument is put back to use.      |
| Autoclaves                                              | Autoclaves use tape with each batch that contains the date, time, length of cycle, and contents of the cycle. Autoclaves are under a PMA and undergo a quarterly PM.                                                                    |                                              |                                          |                                                                                                                          |
| NanoPure water purification system                      | Check conductivity                                                                                                                                                                                                                      |                                              |                                          |                                                                                                                          |
| Temperature controlled devices                          | All water baths, refrigerators, freezers, etc. will be checked prior to and after use.                                                                                                                                                  |                                              |                                          |                                                                                                                          |
| Balances                                                | Balances are calibrated monthly and annually serviced through the PMA.                                                                                                                                                                  |                                              |                                          |                                                                                                                          |
| pH and dissolved oxygen meters                          | pH meters are calibrated daily in buffer.                                                                                                                                                                                               |                                              |                                          |                                                                                                                          |
| Micropipettes                                           | Micropipettes are calibrated annually.                                                                                                                                                                                                  | Annually or as described                     |                                          |                                                                                                                          |
| Tracking and assessment of media, reagents and supplies | All medium is purchased from a nationally recognized supplier. Negative and positive controls are included in each batch. Lot, date of receipt, and expiration dates are all recorded in the laboratory logbook for reagents and media. | As needed or when new chemicals are received | Ensure critical information is recorded. | Document if information is available; qualify any results that are suspect based on uncertainties with expiration dates. |
